# Supplementary material for: Preparation and characterization of novel polysulfone-red mud composite capsules for the removal of fluoride from aqueous solutions
Source: Royal Society of Chemistry journal article supplement (doi:10.1039/c6ra12055e), 2016-01-01
Supplement: c6ra12055e1.pdf [file c6ra12055e1.pdf]

## SUPPORTING INFORMATION

### Preparation and characterization of novel polysulfone-red mud composite capsules for the removal of fluoride from aqueous solutions

Omer Kazak<sup>1</sup>, Ali Tor<sup>1,\*</sup>, Ilker Akin<sup>2</sup>, Gulsin Arslan<sup>3</sup>

<sup>1</sup>Department of Environmental Engineering, Necmettin Erbakan University, 42090, Konya, Turkey

<sup>2</sup>Department of Chemistry, Selcuk University, 42075, Konya, Turkey

<sup>3</sup>Department of Biochemistry, Selcuk University, 42075, Konya, Turkey

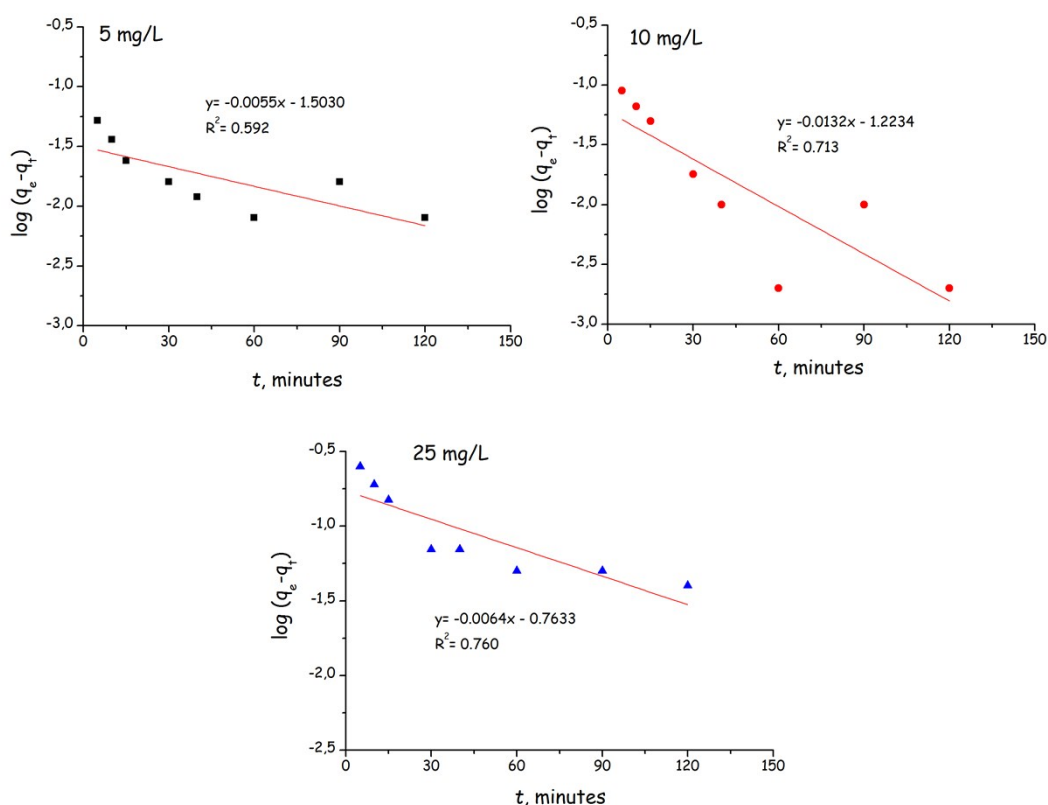

**Figure S1.** Linear plot of pseudo first-order kinetic model (Concentrations of fluoride: 5, 10 and 25 mg/L, initial pH: 3.0, amount of capsule prepared with mass ratio of red mud to PSF (1:1, g:g): 12.5 g/L, shaking speed: 150 rpm, temperature:  $25 \pm 1$  °C).

\* Corresponding author. e-mail: [ali.alitor@gmail.com](mailto:ali.alitor@gmail.com), Tel: + 90 332 3237926-4018, Fax: + 90 332 3238225.

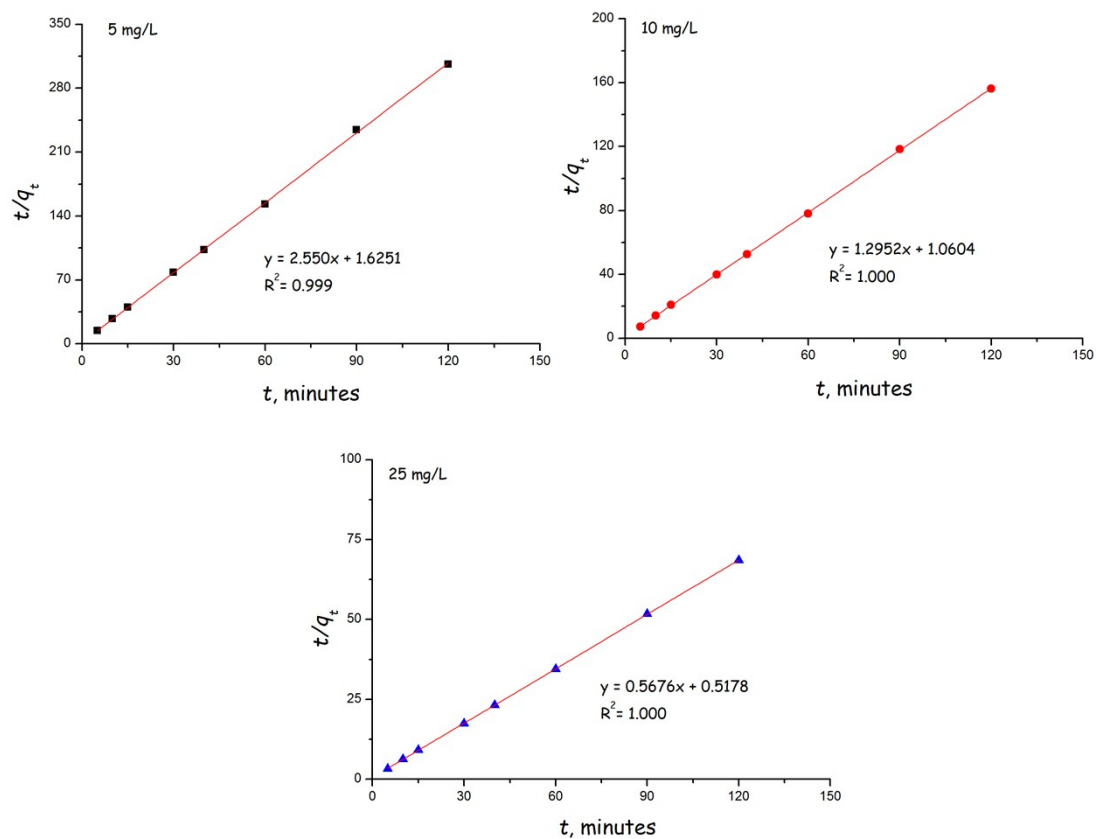

**Figure S2.** Linear plot of pseudo second-order kinetic model (Concentrations of fluoride: 5, 10 and 25 mg/L, initial pH: 3.0, amount of capsule prepared with mass ratio of red mud to PSF (1:1, g:g): 12.5 g/L, shaking speed: 150 rpm, temperature: 25±1 °C).

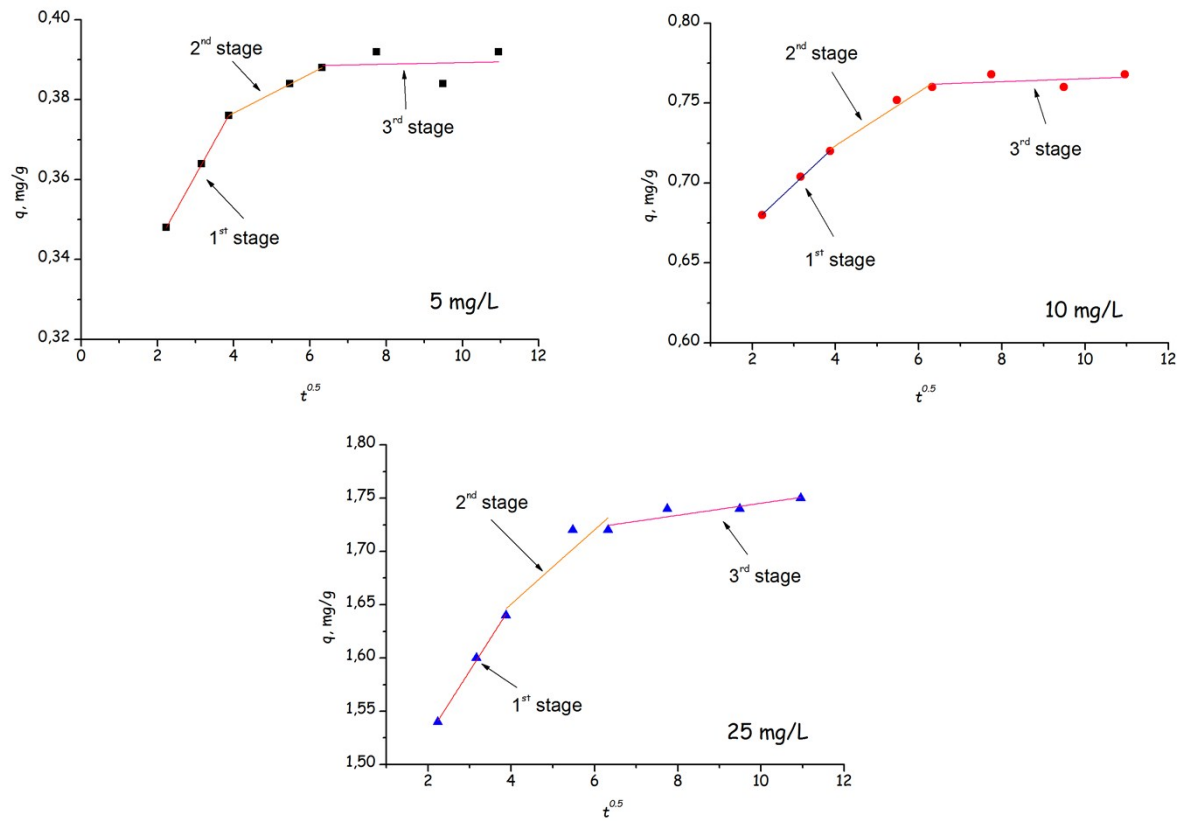

**Figure S3.** Plot of intra-particle diffusion model. (Concentrations of fluoride: 5, 10 and 25 mg/L, initial pH: 3.0, amount of capsule prepared with mass ratio of red mud to PSF (1:1, g:g): 12.5 g/L, shaking speed: 150 rpm, temperature: 25±1 °C).

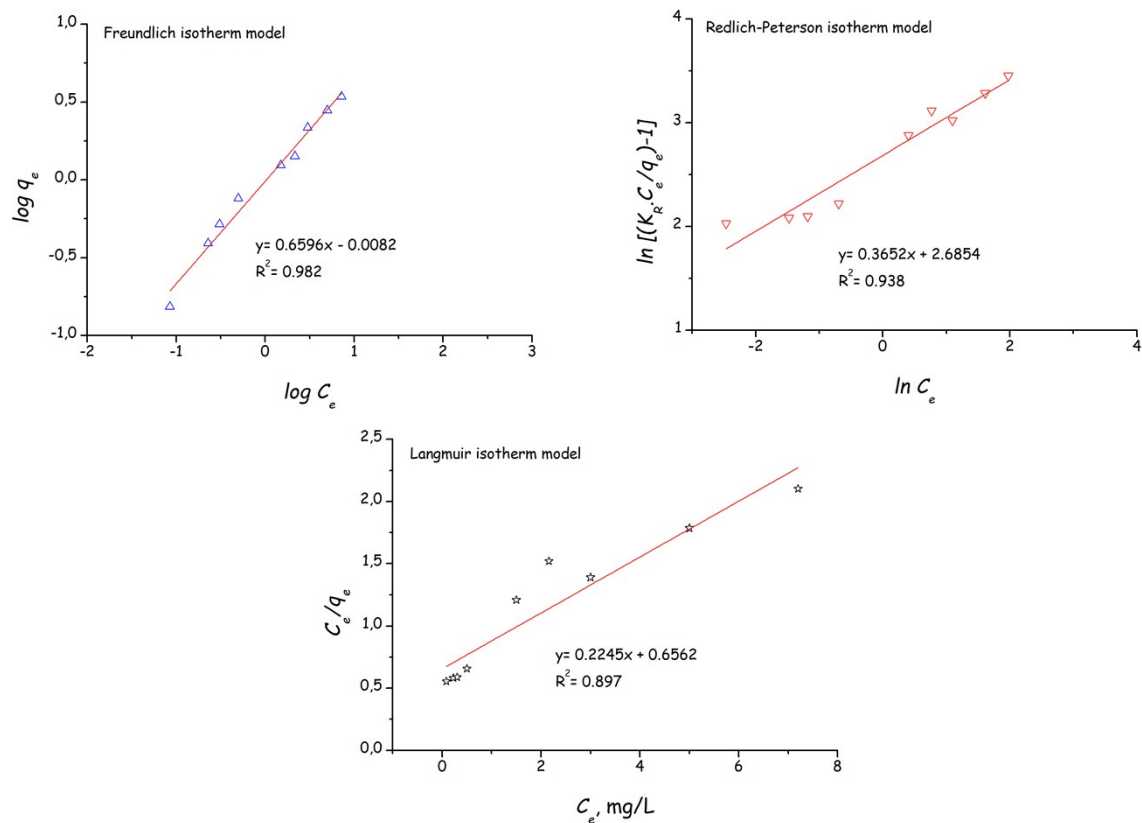

**Figure S4.** Linear plots of Langmuir, Freundlich and Redlich-Peterson isotherm models for the sorption of fluoride from aqueous solution (initial pH: 3.0, contact time: 1 h, amount of capsule prepared with mass ratio of red mud to PSF (1:1, g:g): 12.5 g/L, shaking speed: 150 rpm, temperature:  $25 \pm 1$  °C).
